# Supplementary material for: Characterization and clustering of kinase isoform expression in metastatic melanoma
Source: bioRxiv preprint, doi:10.1101/2021.08.05.455315, version 1 (2021-08-06)
Supplement: Table S3 [file 455315_file04.xlsx]

## Sheet: Sample Metadata
Sample	Sample_Type	Genomic_Subtypes	Region	QoRTs 3' bias	Purity
TCGA-EB-A553-01A-12R-A27Q-07	Primary Tumor	BRAF_Hotspot_Mutants	Primary Tumor	0.67	0.7732
TCGA-EB-A4OZ-01A-12R-A266-07	Primary Tumor	BRAF_Hotspot_Mutants	Primary Tumor	0.67	0.5537
TCGA-DA-A960-01A-11R-A37K-07	Primary Tumor	#N/A	Primary Tumor	0.67	0.792
TCGA-GN-A263-01A-11R-A18T-07	Primary Tumor	BRAF_Hotspot_Mutants	Primary Tumor	0.65	0.7254
TCGA-ER-A2ND-06A-11R-A18T-07	Metastatic	BRAF_Hotspot_Mutants	Distant Metastasis	0.65	0.836
TCGA-WE-A8ZN-06A-11R-A37K-07	Metastatic	#N/A	Regional Skin	0.64	0.5157
TCGA-QB-AA9O-06A-11R-A39D-07	Metastatic	#N/A	Regional Lymph Node	0.64	0.6573
TCGA-D3-A5GT-01A-12R-A311-07	Primary Tumor	#N/A	Primary Tumor	0.64	0.9619
TCGA-D3-A51K-06A-11R-A266-07	Metastatic	Triple_WT	Regional Lymph Node	0.64	0.7831
TCGA-BF-AAP8-01A-11R-A40A-07	Primary Tumor	#N/A	Primary Tumor	0.64	0.8166
TCGA-GN-A267-06A-21R-A18T-07	Metastatic	RAS_Hotspot_Mutants	Regional Lymph Node	0.63	0.784
TCGA-D3-A8GR-06A-11R-A37K-07	Metastatic	#N/A	Distant Metastasis	0.63	0.779
TCGA-D3-A2JK-06A-11R-A18S-07	Metastatic	BRAF_Hotspot_Mutants	Regional Lymph Node	0.63	0.7254
TCGA-ER-A2NB-01A-12R-A18S-07	Primary Tumor	RAS_Hotspot_Mutants	Primary Tumor	0.62	0.7302
TCGA-ER-A194-01A-11R-A18U-07	Primary Tumor	RAS_Hotspot_Mutants	Primary Tumor	0.62	0.6643
TCGA-EB-A4P0-01A-41R-A266-07	Primary Tumor	BRAF_Hotspot_Mutants	Primary Tumor	0.62	0.7466
TCGA-EB-A3XE-01A-12R-A239-07	Primary Tumor	BRAF_Hotspot_Mutants	Primary Tumor	0.62	0.7913
TCGA-D3-A8GO-06A-11R-A37K-07	Metastatic	#N/A	Regional Lymph Node	0.62	0.7235
TCGA-D3-A2JN-06A-11R-A18S-07	Metastatic	BRAF_Hotspot_Mutants	Regional Lymph Node	0.62	0.6111
TCGA-IH-A3EA-01A-11R-A20F-07	Primary Tumor	BRAF_Hotspot_Mutants	Primary Tumor	0.61	0.836
TCGA-EE-A2GH-06A-11R-A18T-07	Metastatic	BRAF_Hotspot_Mutants	Regional Lymph Node	0.61	0.3148
TCGA-EB-A4OY-01A-11R-A266-07	Primary Tumor	Triple_WT	Primary Tumor	0.61	0.7913
TCGA-D3-A8GB-06A-11R-A37K-07	Metastatic	#N/A	Regional Lymph Node	0.61	0.3837
TCGA-D3-A2JL-06A-11R-A18S-07	Metastatic	RAS_Hotspot_Mutants	Regional Lymph Node	0.61	0.6825
TCGA-XV-AAZY-01A-12R-A40A-07	Primary Tumor	#N/A	Primary Tumor	0.6	0.7361
TCGA-XV-AAZV-01A-11R-A40A-07	Primary Tumor	#N/A	Primary Tumor	0.6	0.636
TCGA-ER-A3ES-06A-11R-A20F-07	Metastatic	Triple_WT	Distant Metastasis	0.6	0.9874
TCGA-EB-A85I-01A-11R-A352-07	Primary Tumor	#N/A	Primary Tumor	0.6	0.7485
TCGA-D3-A3C1-06A-12R-A18S-07	Metastatic	BRAF_Hotspot_Mutants	Regional Lymph Node	0.6	0.7953
TCGA-3N-A9WB-06A-11R-A38C-07	Metastatic	#N/A	Distant Metastasis	0.6	0.9267
TCGA-XV-AAZW-01A-12R-A40A-07	Primary Tumor	#N/A	Primary Tumor	0.59	0.8725
TCGA-W3-AA21-06A-11R-A38C-07	Metastatic	#N/A	Regional Lymph Node	0.59	0.8588
TCGA-GN-A8LL-06A-21R-A37K-07	Metastatic	#N/A	Regional Lymph Node	0.59	0.9099
TCGA-GN-A4U8-06A-11R-A32P-07	Metastatic	#N/A	Regional Lymph Node	0.59	0.654
TCGA-GF-A6C9-06A-11R-A311-07	Metastatic	#N/A	Distant Metastasis	0.59	0.2948
TCGA-EE-A2A0-06A-11R-A18T-07	Metastatic	Triple_WT	Regional Lymph Node	0.59	0.5329
TCGA-EB-A5UM-01A-11R-A311-07	Primary Tumor	#N/A	Primary Tumor	0.59	0.7786
TCGA-EB-A299-01A-21R-A18U-07	Primary Tumor	BRAF_Hotspot_Mutants	Primary Tumor	0.59	0.6719
TCGA-DA-A1I5-06A-11R-A18T-07	Metastatic	BRAF_Hotspot_Mutants	Distant Metastasis	0.59	0.4528
TCGA-D3-A8GJ-06A-11R-A37K-07	Metastatic	#N/A	Distant Metastasis	0.59	0.4833
TCGA-D3-A5GO-06A-12R-A27Q-07	Metastatic	RAS_Hotspot_Mutants	Distant Metastasis	0.59	0.712
TCGA-D3-A3MR-06A-11R-A21D-07	Metastatic	BRAF_Hotspot_Mutants	Regional Skin	0.59	0.4711
TCGA-D3-A3C8-06A-12R-A18S-07	Metastatic	Triple_WT	Regional Skin	0.59	0.2489
TCGA-D3-A3C7-06A-11R-A18U-07	Metastatic	BRAF_Hotspot_Mutants	Regional Lymph Node	0.59	0.6833
TCGA-D3-A3C3-06A-12R-A18S-07	Metastatic	BRAF_Hotspot_Mutants	Regional Lymph Node	0.59	0.7691
TCGA-D3-A2JP-06A-11R-A18S-07	Metastatic	BRAF_Hotspot_Mutants	Regional Lymph Node	0.59	0.6208
TCGA-D3-A2JF-06A-11R-A18S-07	Metastatic	RAS_Hotspot_Mutants	Distant Metastasis	0.59	0.6335
TCGA-BF-AAP7-01A-11R-A40A-07	Primary Tumor	#N/A	Primary Tumor	0.59	0.6263
TCGA-BF-AAOU-01A-12R-A39D-07	Primary Tumor	#N/A	Primary Tumor	0.59	0.7913
TCGA-BF-A9VF-01A-11R-A37K-07	Primary Tumor	#N/A	Primary Tumor	0.59	0.8847
TCGA-W3-A824-06A-21R-A352-07	Metastatic	#N/A	Regional Lymph Node	0.58	0.8548
TCGA-GN-A4U7-06A-21R-A32P-07	Metastatic	#N/A	Regional Lymph Node	0.58	0.8806
TCGA-EB-A3Y7-01A-11R-A239-07	Primary Tumor	NF1_Any_Mutants	Primary Tumor	0.58	0.6573
TCGA-D3-A8GS-06A-12R-A37K-07	Metastatic	#N/A	Distant Metastasis	0.58	0.6711
TCGA-BF-A5EO-01A-12R-A27Q-07	Primary Tumor	RAS_Hotspot_Mutants	Primary Tumor	0.58	0.7781
TCGA-3N-A9WD-06A-11R-A38C-07	Metastatic	#N/A	Regional Lymph Node	0.58	0.7653
TCGA-XV-AB01-06A-12R-A40A-07	Metastatic	#N/A	Regional Lymph Node	0.57	NA
TCGA-XV-A9W5-01A-11R-A38C-07	Primary Tumor	#N/A	Primary Tumor	0.57	0.8341
TCGA-XV-A9W2-01A-11R-A39D-07	Primary Tumor	#N/A	Primary Tumor	0.57	0.7466
TCGA-XV-A9VZ-01A-11R-A38C-07	Primary Tumor	#N/A	Primary Tumor	0.57	0.8721
TCGA-WE-A8ZX-06A-11R-A37K-07	Metastatic	#N/A	Regional Lymph Node	0.57	0.7057
TCGA-WE-A8K6-06A-11R-A37K-07	Metastatic	#N/A	Regional Lymph Node	0.57	0.8556
TCGA-WE-A8K5-06A-11R-A37K-07	Metastatic	#N/A	Regional Skin	0.57	0.7913
TCGA-GN-A9SD-06A-11R-A40A-07	Metastatic	#N/A	Regional Lymph Node	0.57	0.6242
TCGA-GN-A8LK-06A-11R-A37K-07	Metastatic	#N/A	Distant Metastasis	0.57	0.9523
TCGA-GN-A4U9-06A-11R-A32P-07	Metastatic	#N/A	Regional Lymph Node	0.57	0.836
TCGA-FR-A7U9-06A-11R-A352-07	Metastatic	#N/A	Regional Lymph Node	0.57	0.504
TCGA-EE-A3JD-06A-11R-A20F-07	Metastatic	NF1_Any_Mutants	Regional Lymph Node	0.57	0.3801
TCGA-EB-A85J-01A-12R-A352-07	Primary Tumor	#N/A	Primary Tumor	0.57	0.7002
TCGA-EB-A5VV-06A-11R-A32P-07	Metastatic	#N/A	Regional Lymph Node	0.57	0.1224
TCGA-EB-A5SF-01A-11R-A311-07	Primary Tumor	#N/A	Primary Tumor	0.57	0.8304
TCGA-EB-A550-01A-61R-A27Q-07	Primary Tumor	-	Primary Tumor	0.57	0.7466
TCGA-EB-A4XL-01A-11R-A27Q-07	Primary Tumor	-	Primary Tumor	0.57	0.7705
TCGA-EB-A430-01A-11R-A24X-07	Primary Tumor	BRAF_Hotspot_Mutants	Primary Tumor	0.57	0.7913
TCGA-EB-A41A-01A-11R-A24X-07	Primary Tumor	NF1_Any_Mutants	Primary Tumor	0.57	0.9254
TCGA-EB-A3XF-01A-31R-A239-07	Primary Tumor	-	Primary Tumor	0.57	0.7905
TCGA-EB-A3XB-01A-11R-A239-07	Primary Tumor	BRAF_Hotspot_Mutants	Primary Tumor	0.57	0.8136
TCGA-DA-A3F2-06A-11R-A20F-07	Metastatic	Triple_WT	Regional Skin	0.57	0.1274
TCGA-D3-A5GL-06A-11R-A27Q-07	Metastatic	-	Regional Lymph Node	0.57	0.914
TCGA-D3-A51N-06A-11R-A266-07	Metastatic	BRAF_Hotspot_Mutants	Regional Lymph Node	0.57	0.6691
TCGA-D3-A51H-06A-12R-A266-07	Metastatic	Triple_WT	Regional Lymph Node	0.57	0.3154
TCGA-D3-A51F-06A-11R-A266-07	Metastatic	BRAF_Hotspot_Mutants	Regional Lymph Node	0.57	0.1358
TCGA-BF-A5ES-01A-11R-A27Q-07	Primary Tumor	-	Primary Tumor	0.57	0.7759
TCGA-BF-A1PX-01A-12R-A18T-07	Primary Tumor	BRAF_Hotspot_Mutants	Primary Tumor	0.57	0.4605
TCGA-WE-AA9Y-06A-12R-A38C-07	Metastatic	#N/A	Regional Lymph Node	0.56	0.6083
TCGA-RP-A694-06A-11R-A311-07	Metastatic	#N/A	Distant Metastasis	0.56	0.7913
TCGA-GN-A4U8-11A-11R-A32P-07	Normal	#N/A	#N/A	0.56	NA
TCGA-GN-A4U5-01A-11R-A32P-07	Primary Tumor	#N/A	Primary Tumor	0.56	0.6388
TCGA-GN-A265-06A-21R-A18T-07	Metastatic	BRAF_Hotspot_Mutants	Regional Lymph Node	0.56	0.334
TCGA-GN-A262-06A-11R-A18T-07	Metastatic	BRAF_Hotspot_Mutants	Regional Skin	0.56	0.8806
TCGA-GF-A6C8-06A-12R-A311-07	Metastatic	#N/A	Regional Lymph Node	0.56	0.6573
TCGA-FS-A4FB-06A-11R-A266-07	Metastatic	BRAF_Hotspot_Mutants	Regional Lymph Node	0.56	0.8806
TCGA-FS-A4F8-06A-11R-A266-07	Metastatic	BRAF_Hotspot_Mutants	Regional Lymph Node	0.56	0.4064
TCGA-FS-A4F4-06A-12R-A266-07	Metastatic	NF1_Any_Mutants	Regional Skin	0.56	0.624
TCGA-FS-A1ZF-06A-12R-A18S-07	Metastatic	BRAF_Hotspot_Mutants	Distant Metastasis	0.56	0.836
TCGA-FR-A7U8-06A-21R-A352-07	Metastatic	#N/A	Distant Metastasis	0.56	0.9114
TCGA-ER-A3EV-06A-11R-A20F-07	Metastatic	Triple_WT	Distant Metastasis	0.56	0.8297
TCGA-ER-A19T-06A-11R-A18U-07	Metastatic	Triple_WT	No Data	0.56	0.9253
TCGA-ER-A19O-06A-11R-A18S-07	Metastatic	BRAF_Hotspot_Mutants	Regional Lymph Node	0.56	0.5199
TCGA-ER-A196-01A-11R-A18T-07	Primary Tumor	Triple_WT	Primary Tumor	0.56	0.836
TCGA-EE-A3JE-06A-11R-A20F-07	Metastatic	BRAF_Hotspot_Mutants	Regional Skin	0.56	0.3343
TCGA-EE-A3JA-06A-11R-A20F-07	Metastatic	RAS_Hotspot_Mutants	Regional Lymph Node	0.56	0.6565
TCGA-EE-A29T-06A-11R-A18T-07	Metastatic	-	Regional Lymph Node	0.56	0.6228
TCGA-EB-A6QZ-01A-12R-A32P-07	Primary Tumor	#N/A	Primary Tumor	0.56	0.7913
TCGA-EB-A5UN-06A-11R-A311-07	Metastatic	#N/A	Distant Metastasis	0.56	0.7466
TCGA-EB-A5SG-06A-11R-A311-07	Metastatic	#N/A	Regional Lymph Node	0.56	0.2416
TCGA-EB-A51B-01A-11R-A27Q-07	Primary Tumor	-	Primary Tumor	0.56	0.8717
TCGA-EB-A41B-01A-11R-A24X-07	Primary Tumor	RAS_Hotspot_Mutants	Primary Tumor	0.56	0.9432
TCGA-EB-A3Y6-01A-21R-A239-07	Primary Tumor	BRAF_Hotspot_Mutants	Primary Tumor	0.56	0.7466
TCGA-DA-A95Z-06A-11R-A37K-07	Metastatic	#N/A	Regional Skin	0.56	0.9084
TCGA-DA-A95W-06A-11R-A37K-07	Metastatic	#N/A	Regional Lymph Node	0.56	0.8885
TCGA-DA-A1I4-06A-11R-A18U-07	Metastatic	BRAF_Hotspot_Mutants	Regional Skin	0.56	0.5223
TCGA-D9-A6EC-06A-11R-A311-07	Metastatic	#N/A	Regional Lymph Node	0.56	0.9391
TCGA-D9-A3Z1-06A-11R-A239-07	Metastatic	RAS_Hotspot_Mutants	Regional Lymph Node	0.56	0.5976
TCGA-D3-A8GV-06A-11R-A37K-07	Metastatic	#N/A	Distant Metastasis	0.56	0.8985
TCGA-D3-A5GS-06A-11R-A27Q-07	Metastatic	BRAF_Hotspot_Mutants	Regional Lymph Node	0.56	0.7227
TCGA-D3-A2JB-06A-11R-A18T-07	Metastatic	Triple_WT	Regional Lymph Node	0.56	0.4889
TCGA-D3-A1Q6-06A-11R-A18T-07	Metastatic	BRAF_Hotspot_Mutants	Regional Skin	0.56	0.836
TCGA-BF-AAP0-06A-11R-A39D-07	Metastatic	#N/A	Regional Lymph Node	0.56	0.3899
TCGA-BF-AAOX-01A-11R-A39D-07	Primary Tumor	#N/A	Primary Tumor	0.56	0.9253
TCGA-BF-A5EQ-01A-21R-A27Q-07	Primary Tumor	BRAF_Hotspot_Mutants	Primary Tumor	0.56	0.742
TCGA-BF-A5EP-01A-12R-A27Q-07	Primary Tumor	-	Primary Tumor	0.56	0.7409
TCGA-BF-A1PU-01A-11R-A18S-07	Primary Tumor	BRAF_Hotspot_Mutants	Primary Tumor	0.56	0.9253
TCGA-YG-AA3P-06A-11R-A38C-07	Metastatic	#N/A	Distant Metastasis	0.55	0.958
TCGA-YD-A9TB-06A-12R-A40A-07	Metastatic	#N/A	Distant Metastasis	0.55	0.7189
TCGA-YD-A89C-06A-11R-A37K-07	Metastatic	#N/A	Distant Metastasis	0.55	0.7019
TCGA-WE-AAA4-06A-12R-A38C-07	Metastatic	#N/A	Regional Skin	0.55	0.3036
TCGA-WE-AAA0-06A-11R-A38C-07	Metastatic	#N/A	Regional Lymph Node	0.55	0.8331
TCGA-WE-A8K1-06A-21R-A37K-07	Metastatic	#N/A	Regional Skin	0.55	0.6607
TCGA-W3-A828-06A-11R-A352-07	Metastatic	#N/A	Distant Metastasis	0.55	0.6126
TCGA-W3-A825-06A-11R-A352-07	Metastatic	#N/A	Distant Metastasis	0.55	0.6401
TCGA-RP-A695-06A-11R-A311-07	Metastatic	#N/A	Distant Metastasis	0.55	0.8744
TCGA-QB-A6FS-06A-11R-A311-07	Metastatic	#N/A	Regional Lymph Node	0.55	0.5702
TCGA-HR-A5NC-01A-11R-A27Q-07	Primary Tumor	-	Primary Tumor	0.55	0.836
TCGA-GN-A4U3-06A-11R-A32P-07	Metastatic	#N/A	Distant Metastasis	0.55	0.7913
TCGA-GN-A26C-01A-11R-A18T-07	Primary Tumor	NF1_Any_Mutants	Primary Tumor	0.55	0.5349
TCGA-FW-A3TU-06A-11R-A239-07	Metastatic	NF1_Any_Mutants	Distant Metastasis	0.55	0.8609
TCGA-FS-A1ZW-06A-12R-A18T-07	Metastatic	RAS_Hotspot_Mutants	Regional Lymph Node	0.55	0.6346
TCGA-FS-A1ZP-06A-11R-A18T-07	Metastatic	RAS_Hotspot_Mutants	Regional Lymph Node	0.55	0.7815
TCGA-FS-A1ZB-06A-12R-A18S-07	Metastatic	RAS_Hotspot_Mutants	Distant Metastasis	0.55	0.6465
TCGA-FS-A1Z7-06A-11R-A18T-07	Metastatic	BRAF_Hotspot_Mutants	Regional Lymph Node	0.55	0.7019
TCGA-FR-A728-01A-11R-A32P-07	Primary Tumor	#N/A	Primary Tumor	0.55	0.6154
TCGA-FR-A3R1-01A-11R-A239-07	Primary Tumor	NF1_Any_Mutants	Primary Tumor	0.55	0.8345
TCGA-ER-A42L-06A-11R-A24X-07	Metastatic	BRAF_Hotspot_Mutants	Distant Metastasis	0.55	0.566
TCGA-ER-A2NH-06A-11R-A18S-07	Metastatic	RAS_Hotspot_Mutants	Regional Lymph Node	0.55	0.3664
TCGA-ER-A2NC-06A-11R-A18T-07	Metastatic	-	Distant Metastasis	0.55	0.6307
TCGA-ER-A19K-01A-21R-A18T-07	Primary Tumor	BRAF_Hotspot_Mutants	Primary Tumor	0.55	0.8383
TCGA-ER-A199-06A-11R-A18T-07	Metastatic	RAS_Hotspot_Mutants	Regional Lymph Node	0.55	0.538
TCGA-ER-A197-06A-32R-A18S-07	Metastatic	Triple_WT	No Data	0.55	0.498
TCGA-EE-A3JH-06A-11R-A21D-07	Metastatic	BRAF_Hotspot_Mutants	Regional Lymph Node	0.55	0.2524
TCGA-EE-A2MU-06A-21R-A18S-07	Metastatic	RAS_Hotspot_Mutants	Regional Skin	0.55	0.4696
TCGA-EE-A2MT-06A-11R-A18S-07	Metastatic	NF1_Any_Mutants	Regional Lymph Node	0.55	0.7645
TCGA-EE-A2MS-06A-11R-A18S-07	Metastatic	NF1_Any_Mutants	Regional Lymph Node	0.55	0.8283
TCGA-EE-A2MP-06A-11R-A18S-07	Metastatic	BRAF_Hotspot_Mutants	Regional Lymph Node	0.55	0.7019
TCGA-EE-A2MK-06A-11R-A18S-07	Metastatic	BRAF_Hotspot_Mutants	Regional Lymph Node	0.55	0.7387
TCGA-EE-A2MG-06A-11R-A18T-07	Metastatic	BRAF_Hotspot_Mutants	Regional Lymph Node	0.55	0.3478
TCGA-EE-A2M5-06A-12R-A18S-07	Metastatic	BRAF_Hotspot_Mutants	Regional Lymph Node	0.55	0.7616
TCGA-EE-A2GS-06A-12R-A18S-07	Metastatic	BRAF_Hotspot_Mutants	Regional Skin	0.55	0.7838
TCGA-EE-A2GM-06B-11R-A18S-07	Metastatic	RAS_Hotspot_Mutants	Regional Skin	0.55	0.8806
TCGA-EE-A2GI-06A-11R-A18T-07	Metastatic	NF1_Any_Mutants	Regional Lymph Node	0.55	0.7065
TCGA-EE-A29S-06A-11R-A18T-07	Metastatic	RAS_Hotspot_Mutants	Regional Lymph Node	0.55	0.7291
TCGA-EE-A29R-06A-11R-A18T-07	Metastatic	RAS_Hotspot_Mutants	Regional Lymph Node	0.55	0.8239
TCGA-EE-A29Q-06A-11R-A18T-07	Metastatic	RAS_Hotspot_Mutants	Regional Skin	0.55	0.836
TCGA-EE-A29B-06A-11R-A18U-07	Metastatic	RAS_Hotspot_Mutants	Distant Metastasis	0.55	0.8806
TCGA-EE-A20C-06A-11R-A18S-07	Metastatic	RAS_Hotspot_Mutants	Distant Metastasis	0.55	0.9253
TCGA-EB-A97M-01A-11R-A38C-07	Primary Tumor	#N/A	Primary Tumor	0.55	0.7913
TCGA-EB-A82B-01A-11R-A352-07	Primary Tumor	#N/A	Primary Tumor	0.55	0.6482
TCGA-EB-A6L9-06A-11R-A32P-07	Metastatic	#N/A	Regional Lymph Node	0.55	0.4387
TCGA-EB-A5KH-06A-11R-A27Q-07	Metastatic	-	Regional Lymph Node	0.55	0.8467
TCGA-EB-A4IQ-01A-12R-A266-07	Primary Tumor	Triple_WT	Primary Tumor	0.55	0.836
TCGA-EB-A44R-06A-41R-A266-07	Metastatic	RAS_Hotspot_Mutants	Regional Lymph Node	0.55	0.7744
TCGA-EB-A44P-01A-11R-A266-07	Primary Tumor	BRAF_Hotspot_Mutants	Primary Tumor	0.55	0.7913
TCGA-EB-A44N-01A-11R-A266-07	Primary Tumor	BRAF_Hotspot_Mutants	Primary Tumor	0.55	0.7405
TCGA-EB-A42Z-01A-12R-A24X-07	Primary Tumor	BRAF_Hotspot_Mutants	Primary Tumor	0.55	0.836
TCGA-EB-A3XC-01A-11R-A239-07	Primary Tumor	BRAF_Hotspot_Mutants	Primary Tumor	0.55	0.7913
TCGA-EB-A1NK-01A-11R-A18T-07	Primary Tumor	RAS_Hotspot_Mutants	Primary Tumor	0.55	0.7466
TCGA-DA-A1IB-06A-11R-A18S-07	Metastatic	Triple_WT	Regional Lymph Node	0.55	0.2138
TCGA-D9-A3Z4-01A-11R-A239-07	Primary Tumor	RAS_Hotspot_Mutants	Primary Tumor	0.55	0.8105
TCGA-D3-A8GN-06A-11R-A37K-07	Metastatic	#N/A	Distant Metastasis	0.55	0.6407
TCGA-D3-A8GD-06A-11R-A37K-07	Metastatic	#N/A	Regional Lymph Node	0.55	0.4419
TCGA-D3-A5GU-06A-11R-A27Q-07	Metastatic	BRAF_Hotspot_Mutants	Regional Lymph Node	0.55	0.836
TCGA-D3-A3BZ-06A-12R-A18S-07	Metastatic	Triple_WT	Regional Lymph Node	0.55	0.379
TCGA-D3-A2JA-06A-11R-A18T-07	Metastatic	BRAF_Hotspot_Mutants	Regional Skin	0.55	0.5295
TCGA-D3-A2J8-06A-11R-A18T-07	Metastatic	RAS_Hotspot_Mutants	Regional Lymph Node	0.55	0.4212
TCGA-D3-A1Q1-06A-21R-A18T-07	Metastatic	RAS_Hotspot_Mutants	Regional Lymph Node	0.55	0.8698
TCGA-BF-AAP2-01A-11R-A40A-07	Primary Tumor	#N/A	Primary Tumor	0.55	0.8246
TCGA-BF-A3DJ-01A-11R-A20F-07	Primary Tumor	BRAF_Hotspot_Mutants	Primary Tumor	0.55	0.7019
TCGA-BF-A1PZ-01A-11R-A18S-07	Primary Tumor	RAS_Hotspot_Mutants	Primary Tumor	0.55	0.9223
TCGA-Z2-AA3V-06A-11R-A39D-07	Metastatic	#N/A	Regional Lymph Node	0.54	0.4552
TCGA-WE-AAA3-06A-11R-A38C-07	Metastatic	#N/A	Regional Lymph Node	0.54	0.6847
TCGA-WE-A8ZQ-06A-41R-A37K-07	Metastatic	#N/A	Regional Lymph Node	0.54	0.9397
TCGA-WE-A8K4-01A-12R-A37K-07	Primary Tumor	#N/A	Primary Tumor	0.54	0.7361
TCGA-W3-AA1W-06A-11R-A38C-07	Metastatic	#N/A	Distant Metastasis	0.54	0.4637
TCGA-W3-AA1R-06A-11R-A39D-07	Metastatic	#N/A	Regional Lymph Node	0.54	0.7466
TCGA-RP-A693-06A-13R-A311-07	Metastatic	#N/A	Distant Metastasis	0.54	0.6568
TCGA-LH-A9QB-06A-11R-A38C-07	Metastatic	#N/A	Distant Metastasis	0.54	0.8925
TCGA-HR-A2OH-06A-11R-A18U-07	Metastatic	#N/A	Distant Metastasis	0.54	0.4069
TCGA-HR-A2OG-06A-21R-A18U-07	Metastatic	#N/A	Distant Metastasis	0.54	0.521
TCGA-GN-A8LN-01A-11R-A37K-07	Primary Tumor	#N/A	Primary Tumor	0.54	0.7913
TCGA-GF-A4EO-06A-12R-A24X-07	Metastatic	BRAF_Hotspot_Mutants	Regional Lymph Node	0.54	0.368
TCGA-GF-A2C7-01A-11R-A18T-07	Primary Tumor	BRAF_Hotspot_Mutants	Primary Tumor	0.54	0.9338
TCGA-FW-A5DY-06A-11R-A311-07	Metastatic	#N/A	Regional Lymph Node	0.54	0.4974
TCGA-FW-A3I3-06A-11R-A21D-07	Metastatic	NF1_Any_Mutants	Distant Metastasis	0.54	0.8806
TCGA-FS-A4FD-06A-11R-A266-07	Metastatic	RAS_Hotspot_Mutants	Regional Lymph Node	0.54	0.8141
TCGA-FS-A4F5-06A-11R-A266-07	Metastatic	RAS_Hotspot_Mutants	Regional Skin	0.54	0.901
TCGA-FS-A4F2-06A-11R-A24X-07	Metastatic	-	Regional Skin	0.54	0.8571
TCGA-FS-A1ZU-06A-12R-A18T-07	Metastatic	Triple_WT	Distant Metastasis	0.54	0.904
TCGA-FS-A1ZR-06A-21R-A18U-07	Metastatic	BRAF_Hotspot_Mutants	Regional Skin	0.54	0.7963
TCGA-FS-A1ZN-01A-11R-A18T-07	Primary Tumor	BRAF_Hotspot_Mutants	Primary Tumor	0.54	0.8985
TCGA-FS-A1ZM-06A-12R-A18S-07	Metastatic	BRAF_Hotspot_Mutants	Regional Skin	0.54	0.7221
TCGA-FS-A1ZH-06A-11R-A18T-07	Metastatic	BRAF_Hotspot_Mutants	Regional Lymph Node	0.54	0.4772
TCGA-FR-A7UA-06A-32R-A352-07	Metastatic	#N/A	Regional Lymph Node	0.54	0.1639
TCGA-FR-A44A-06A-11R-A24X-07	Metastatic	BRAF_Hotspot_Mutants	Regional Lymph Node	0.54	0.3581
TCGA-ER-A42K-06A-11R-A24X-07	Metastatic	BRAF_Hotspot_Mutants	Regional Lymph Node	0.54	0.868
TCGA-ER-A42H-01A-11R-A24X-07	Primary Tumor	Triple_WT	Primary Tumor	0.54	0.8654
TCGA-ER-A3PL-06A-11R-A239-07	Metastatic	BRAF_Hotspot_Mutants	Regional Skin	0.54	0.7913
TCGA-ER-A3ET-06A-11R-A20F-07	Metastatic	Triple_WT	Regional Skin	0.54	0.6196
TCGA-ER-A19N-06A-11R-A18S-07	Metastatic	RAS_Hotspot_Mutants	Regional Lymph Node	0.54	0.4544
TCGA-ER-A19D-06A-11R-A18S-07	Metastatic	RAS_Hotspot_Mutants	Regional Skin	0.54	0.7317
TCGA-EE-A3J8-06A-11R-A20F-07	Metastatic	RAS_Hotspot_Mutants	Regional Skin	0.54	0.8806
TCGA-EE-A3J4-06A-11R-A20F-07	Metastatic	BRAF_Hotspot_Mutants	Regional Skin	0.54	0.836
TCGA-EE-A3J3-06A-11R-A20F-07	Metastatic	BRAF_Hotspot_Mutants	Regional Skin	0.54	0.7466
TCGA-EE-A3AB-06A-11R-A18S-07	Metastatic	BRAF_Hotspot_Mutants	Regional Lymph Node	0.54	0.5728
TCGA-EE-A2MJ-06A-11R-A18S-07	Metastatic	NF1_Any_Mutants	Regional Lymph Node	0.54	0.4888
TCGA-EE-A2MI-06A-11R-A18U-07	Metastatic	NF1_Any_Mutants	Regional Lymph Node	0.54	0.6082
TCGA-EE-A2MH-06A-11R-A18S-07	Metastatic	BRAF_Hotspot_Mutants	Regional Lymph Node	0.54	0.6436
TCGA-EE-A2MC-06A-12R-A18S-07	Metastatic	RAS_Hotspot_Mutants	Regional Lymph Node	0.54	0.4217
TCGA-EE-A2M8-06A-12R-A18S-07	Metastatic	BRAF_Hotspot_Mutants	Regional Lymph Node	0.54	0.265
TCGA-EE-A2M6-06A-12R-A18S-07	Metastatic	BRAF_Hotspot_Mutants	Regional Lymph Node	0.54	0.7899
TCGA-EE-A2GT-06A-12R-A18S-07	Metastatic	BRAF_Hotspot_Mutants	Regional Lymph Node	0.54	0.5746
TCGA-EE-A2GP-06A-11R-A18S-07	Metastatic	RAS_Hotspot_Mutants	Regional Skin	0.54	0.6928
TCGA-EE-A2GL-06A-11R-A18S-07	Metastatic	RAS_Hotspot_Mutants	Regional Lymph Node	0.54	0.5545
TCGA-EE-A2GK-06A-11R-A18S-07	Metastatic	Triple_WT	Regional Lymph Node	0.54	0.1604
TCGA-EE-A2GD-06A-11R-A18T-07	Metastatic	RAS_Hotspot_Mutants	Regional Skin	0.54	0.5537
TCGA-EE-A2GC-06A-11R-A18T-07	Metastatic	NF1_Any_Mutants	Regional Lymph Node	0.54	0.6948
TCGA-EE-A2A2-06A-11R-A18T-07	Metastatic	RAS_Hotspot_Mutants	Regional Lymph Node	0.54	0.8306
TCGA-EE-A29P-06A-11R-A18T-07	Metastatic	BRAF_Hotspot_Mutants	Regional Lymph Node	0.54	0.5956
TCGA-EE-A29M-06A-11R-A18T-07	Metastatic	BRAF_Hotspot_Mutants	Regional Lymph Node	0.54	0.81
TCGA-EE-A29E-06A-11R-A18T-07	Metastatic	BRAF_Hotspot_Mutants	Regional Lymph Node	0.54	0.8806
TCGA-EE-A29C-06A-21R-A18S-07	Metastatic	BRAF_Hotspot_Mutants	Regional Lymph Node	0.54	0.651
TCGA-EE-A20F-06A-21R-A18S-07	Metastatic	BRAF_Hotspot_Mutants	Regional Lymph Node	0.54	0.7416
TCGA-EE-A183-06A-11R-A18S-07	Metastatic	BRAF_Hotspot_Mutants	Regional Lymph Node	0.54	0.5834
TCGA-EE-A182-06A-11R-A18T-07	Metastatic	NF1_Any_Mutants	Distant Metastasis	0.54	0.6689
TCGA-EE-A17Z-06A-11R-A18S-07	Metastatic	Triple_WT	Regional Lymph Node	0.54	0.9253
TCGA-EE-A17Y-06A-11R-A18T-07	Metastatic	BRAF_Hotspot_Mutants	Regional Skin	0.54	0.836
TCGA-EE-A17X-06A-11R-A18S-07	Metastatic	RAS_Hotspot_Mutants	Regional Lymph Node	0.54	0.836
TCGA-EB-A82C-01A-11R-A352-07	Primary Tumor	#N/A	Primary Tumor	0.54	0.9432
TCGA-EB-A6QY-01A-12R-A32P-07	Primary Tumor	#N/A	Primary Tumor	0.54	0.7913
TCGA-EB-A5VU-01A-21R-A32P-07	Primary Tumor	#N/A	Primary Tumor	0.54	0.8717
TCGA-EB-A5SH-06A-11R-A311-07	Metastatic	#N/A	Regional Lymph Node	0.54	0.8454
TCGA-EB-A5FP-01A-11R-A27Q-07	Primary Tumor	-	Primary Tumor	0.54	0.836
TCGA-EB-A57M-01A-51R-A311-07	Primary Tumor	#N/A	Primary Tumor	0.54	0.7056
TCGA-EB-A4IS-01A-21R-A266-07	Primary Tumor	BRAF_Hotspot_Mutants	Primary Tumor	0.54	0.5158
TCGA-EB-A3XD-01A-22R-A239-07	Primary Tumor	BRAF_Hotspot_Mutants	Primary Tumor	0.54	0.6126
TCGA-EB-A3HV-01A-11R-A21D-07	Primary Tumor	BRAF_Hotspot_Mutants	Primary Tumor	0.54	0.7466
TCGA-DA-A95V-06A-11R-A37K-07	Metastatic	#N/A	Regional Lymph Node	0.54	0.7277
TCGA-DA-A3F8-06A-11R-A20F-07	Metastatic	BRAF_Hotspot_Mutants	Regional Lymph Node	0.54	0.3529
TCGA-DA-A1IC-06A-11R-A18S-07	Metastatic	NF1_Any_Mutants	Regional Skin	0.54	0.8057
TCGA-DA-A1I7-06A-22R-A18S-07	Metastatic	BRAF_Hotspot_Mutants	Regional Skin	0.54	0.7466
TCGA-DA-A1I2-06A-21R-A18U-07	Metastatic	BRAF_Hotspot_Mutants	Regional Lymph Node	0.54	0.7923
TCGA-DA-A1I0-06A-11R-A20F-07	Metastatic	BRAF_Hotspot_Mutants	Regional Skin	0.54	0.6709
TCGA-DA-A1HY-06A-11R-A18T-07	Metastatic	BRAF_Hotspot_Mutants	Regional Lymph Node	0.54	0.8282
TCGA-D9-A6EA-06A-11R-A311-07	Metastatic	#N/A	No Data	0.54	0.9387
TCGA-D9-A6E9-06A-12R-A311-07	Metastatic	#N/A	Regional Skin	0.54	0.4904
TCGA-D3-A8GE-06A-11R-A37K-07	Metastatic	#N/A	Regional Skin	0.54	0.5164
TCGA-D3-A51T-06A-11R-A266-07	Metastatic	RAS_Hotspot_Mutants	Regional Lymph Node	0.54	0.8351
TCGA-D3-A51R-06A-11R-A266-07	Metastatic	RAS_Hotspot_Mutants	Regional Lymph Node	0.54	0.7913
TCGA-D3-A51J-06A-11R-A266-07	Metastatic	BRAF_Hotspot_Mutants	Regional Skin	0.54	0.4934
TCGA-D3-A51G-06A-11R-A266-07	Metastatic	RAS_Hotspot_Mutants	Regional Skin	0.54	0.7019
TCGA-D3-A3MO-06A-11R-A21D-07	Metastatic	BRAF_Hotspot_Mutants	Regional Skin	0.54	0.9089
TCGA-D3-A3CF-06A-11R-A18T-07	Metastatic	Triple_WT	Regional Lymph Node	0.54	0.5025
TCGA-D3-A3CC-06A-11R-A18S-07	Metastatic	Triple_WT	Regional Skin	0.54	0.8066
TCGA-D3-A2JO-06A-11R-A18S-07	Metastatic	RAS_Hotspot_Mutants	Regional Skin	0.54	0.5474
TCGA-D3-A2JG-06A-11R-A18T-07	Metastatic	BRAF_Hotspot_Mutants	Regional Lymph Node	0.54	0.8806
TCGA-D3-A2JE-06A-11R-A37K-07	Metastatic	#N/A	Regional Lymph Node	0.54	0.7913
TCGA-D3-A2J9-06A-11R-A18T-07	Metastatic	Triple_WT	Regional Lymph Node	0.54	0.2714
TCGA-D3-A2J7-06A-11R-A18T-07	Metastatic	BRAF_Hotspot_Mutants	Regional Lymph Node	0.54	0.6666
TCGA-D3-A1Q8-06A-11R-A18T-07	Metastatic	RAS_Hotspot_Mutants	Regional Lymph Node	0.54	0.5662
TCGA-BF-AAP4-01A-11R-A40A-07	Primary Tumor	#N/A	Primary Tumor	0.54	0.7565
TCGA-BF-AAP1-01A-11R-A39D-07	Primary Tumor	#N/A	Primary Tumor	0.54	0.9473
TCGA-BF-A5ER-01A-12R-A27Q-07	Primary Tumor	-	Primary Tumor	0.54	0.8488
TCGA-BF-A3DL-01A-11R-A20F-07	Primary Tumor	BRAF_Hotspot_Mutants	Primary Tumor	0.54	0.8493
TCGA-YD-A9TA-06A-11R-A39D-07	Metastatic	#N/A	Distant Metastasis	0.53	0.7067
TCGA-W3-AA1V-06B-11R-A40A-07	Metastatic	#N/A	Regional Lymph Node	0.53	0.7409
TCGA-W3-AA1Q-06A-11R-A38C-07	Metastatic	#N/A	Distant Metastasis	0.53	0.7843
TCGA-W3-AA1O-06A-11R-A38C-07	Metastatic	#N/A	Regional Lymph Node	0.53	0.7913
TCGA-RP-A6K9-06A-41R-A352-07	Metastatic	#N/A	Distant Metastasis	0.53	0.7019
TCGA-RP-A690-06A-11R-A311-07	Metastatic	#N/A	Distant Metastasis	0.53	0.9259
TCGA-GN-A4U4-06A-11R-A32P-07	Metastatic	#N/A	Regional Lymph Node	0.53	0.7913
TCGA-GN-A26A-06A-11R-A18T-07	Metastatic	Triple_WT	Regional Skin	0.53	0.5782
TCGA-GN-A268-06A-11R-A18T-07	Metastatic	RAS_Hotspot_Mutants	Regional Lymph Node	0.53	0.9562
TCGA-GN-A266-06A-11R-A18T-07	Metastatic	NF1_Any_Mutants	Regional Skin	0.53	0.455
TCGA-GN-A264-06A-11R-A18U-07	Metastatic	Triple_WT	Regional Lymph Node	0.53	0.7974
TCGA-GF-A769-01A-32R-A32P-07	Primary Tumor	#N/A	Primary Tumor	0.53	0.7913
TCGA-GF-A3OT-06A-23R-A239-07	Metastatic	RAS_Hotspot_Mutants	Regional Lymph Node	0.53	0.648
TCGA-FW-A3R5-06A-11R-A239-07	Metastatic	-	Regional Lymph Node	0.53	0.7764
TCGA-FS-A4FC-06A-11R-A24X-07	Metastatic	RAS_Hotspot_Mutants	Regional Skin	0.53	0.8144
TCGA-FS-A4F9-06A-11R-A24X-07	Metastatic	RAS_Hotspot_Mutants	Regional Lymph Node	0.53	0.927
TCGA-FS-A4F0-06A-11R-A24X-07	Metastatic	Triple_WT	Regional Skin	0.53	0.9408
TCGA-FS-A1ZY-06A-11R-A18S-07	Metastatic	RAS_Hotspot_Mutants	Distant Metastasis	0.53	0.9314
TCGA-FS-A1ZJ-06A-12R-A18S-07	Metastatic	Triple_WT	Regional Lymph Node	0.53	0.8806
TCGA-FS-A1ZD-06A-11R-A18T-07	Metastatic	BRAF_Hotspot_Mutants	Regional Lymph Node	0.53	0.8109
TCGA-FS-A1ZC-06A-11R-A18T-07	Metastatic	BRAF_Hotspot_Mutants	Distant Metastasis	0.53	0.8806
TCGA-FS-A1Z4-06A-11R-A18T-07	Metastatic	Triple_WT	Regional Lymph Node	0.53	0.4877
TCGA-FS-A1YY-06A-11R-A18T-07	Metastatic	BRAF_Hotspot_Mutants	Distant Metastasis	0.53	0.8052
TCGA-FS-A1YX-06A-11R-A18T-07	Metastatic	BRAF_Hotspot_Mutants	Regional Skin	0.53	0.6925
TCGA-FR-A729-06A-11R-A352-07	Metastatic	#N/A	Regional Lymph Node	0.53	0.5351
TCGA-FR-A726-01A-11R-A32P-07	Primary Tumor	#N/A	Primary Tumor	0.53	0.7913
TCGA-FR-A69P-06A-21R-A311-07	Metastatic	#N/A	Regional Lymph Node	0.53	0.7913
TCGA-FR-A3YO-06A-11R-A239-07	Metastatic	BRAF_Hotspot_Mutants	Distant Metastasis	0.53	0.7506
TCGA-FR-A2OS-01A-11R-A21D-07	Primary Tumor	Triple_WT	Primary Tumor	0.53	0.8806
TCGA-ER-A2NF-06A-11R-A18T-07	Metastatic	Triple_WT	No Data	0.53	0.7913
TCGA-ER-A2NF-01A-11R-A18T-07	Primary Tumor	-	Primary Tumor	0.53	0.726733
TCGA-ER-A1A1-06A-11R-A18U-07	Metastatic	Triple_WT	Regional Lymph Node	0.53	0.2988
TCGA-ER-A19W-06A-41R-A239-07	Metastatic	RAS_Hotspot_Mutants	Regional Skin	0.53	0.4453
TCGA-ER-A19S-06A-11R-A18U-07	Metastatic	BRAF_Hotspot_Mutants	Regional Lymph Node	0.53	0.3987
TCGA-ER-A19P-06A-11R-A18S-07	Metastatic	BRAF_Hotspot_Mutants	Regional Lymph Node	0.53	0.2575
TCGA-ER-A19L-06A-12R-A18S-07	Metastatic	Triple_WT	Regional Lymph Node	0.53	0.9521
TCGA-ER-A19G-06A-11R-A18U-07	Metastatic	BRAF_Hotspot_Mutants	Regional Lymph Node	0.53	0.6414
TCGA-ER-A19E-06A-11R-A18S-07	Metastatic	BRAF_Hotspot_Mutants	Regional Lymph Node	0.53	0.688
TCGA-ER-A19C-06A-11R-A18S-07	Metastatic	BRAF_Hotspot_Mutants	Regional Lymph Node	0.53	0.8282
TCGA-ER-A19A-06A-21R-A18U-07	Metastatic	NF1_Any_Mutants	Regional Skin	0.53	0.2933
TCGA-ER-A195-06A-11R-A18U-07	Metastatic	RAS_Hotspot_Mutants	Regional Lymph Node	0.53	0.6585
TCGA-ER-A193-06A-12R-A18S-07	Metastatic	BRAF_Hotspot_Mutants	Regional Lymph Node	0.53	0.6823
TCGA-EE-A3JI-06A-11R-A21D-07	Metastatic	RAS_Hotspot_Mutants	Regional Lymph Node	0.53	0.9082
TCGA-EE-A3JB-06A-11R-A21D-07	Metastatic	BRAF_Hotspot_Mutants	Regional Skin	0.53	0.6482
TCGA-EE-A3J7-06A-11R-A20F-07	Metastatic	RAS_Hotspot_Mutants	Regional Skin	0.53	0.945
TCGA-EE-A3J5-06A-11R-A20F-07	Metastatic	NF1_Any_Mutants	Regional Skin	0.53	0.6587
TCGA-EE-A3AH-06A-11R-A18S-07	Metastatic	BRAF_Hotspot_Mutants	Regional Lymph Node	0.53	0.8891
TCGA-EE-A3AF-06A-11R-A18S-07	Metastatic	BRAF_Hotspot_Mutants	Regional Lymph Node	0.53	0.6925
TCGA-EE-A3AA-06A-11R-A18S-07	Metastatic	BRAF_Hotspot_Mutants	Regional Lymph Node	0.53	0.6987
TCGA-EE-A2MM-06A-11R-A18S-07	Metastatic	RAS_Hotspot_Mutants	Regional Lymph Node	0.53	0.8567
TCGA-EE-A2MF-06A-11R-A21D-07	Metastatic	RAS_Hotspot_Mutants	Regional Lymph Node	0.53	0.8497
TCGA-EE-A2ME-06A-11R-A18T-07	Metastatic	BRAF_Hotspot_Mutants	Regional Lymph Node	0.53	0.202
TCGA-EE-A2M7-06A-11R-A18U-07	Metastatic	BRAF_Hotspot_Mutants	Regional Lymph Node	0.53	0.7229
TCGA-EE-A2GO-06A-11R-A18S-07	Metastatic	RAS_Hotspot_Mutants	Regional Skin	0.53	0.9131
TCGA-EE-A2GN-06A-11R-A18S-07	Metastatic	RAS_Hotspot_Mutants	Regional Skin	0.53	0.7466
TCGA-EE-A2GE-06A-11R-A18T-07	Metastatic	BRAF_Hotspot_Mutants	Regional Lymph Node	0.53	0.4027
TCGA-EE-A2A6-06A-11R-A18T-07	Metastatic	BRAF_Hotspot_Mutants	Regional Lymph Node	0.53	0.6126
TCGA-EE-A2A5-06A-11R-A18T-07	Metastatic	RAS_Hotspot_Mutants	Regional Skin	0.53	0.8531
TCGA-EE-A2A1-06A-11R-A18T-07	Metastatic	RAS_Hotspot_Mutants	Regional Lymph Node	0.53	0.4222
TCGA-EE-A29V-06A-12R-A18S-07	Metastatic	RAS_Hotspot_Mutants	Distant Metastasis	0.53	0.8985
TCGA-EE-A29N-06A-12R-A18S-07	Metastatic	NF1_Any_Mutants	Regional Lymph Node	0.53	0.6174
TCGA-EE-A29G-06A-12R-A18T-07	Metastatic	RAS_Hotspot_Mutants	Regional Skin	0.53	0.7467
TCGA-EE-A29A-06A-12R-A18U-07	Metastatic	BRAF_Hotspot_Mutants	Distant Metastasis	0.53	0.8786
TCGA-EE-A20B-06A-11R-A18U-07	Metastatic	BRAF_Hotspot_Mutants	Regional Skin	0.53	0.691
TCGA-EE-A184-06A-11R-A18S-07	Metastatic	RAS_Hotspot_Mutants	Distant Metastasis	0.53	0.8125
TCGA-EB-A5UL-06A-11R-A311-07	Metastatic	#N/A	Regional Lymph Node	0.53	0.7915
TCGA-EB-A5SE-01A-11R-A311-07	Primary Tumor	#N/A	Primary Tumor	0.53	0.8806
TCGA-EB-A551-01A-21R-A27Q-07	Primary Tumor	RAS_Hotspot_Mutants	Primary Tumor	0.53	0.5706
TCGA-EB-A44Q-06A-11R-A266-07	Metastatic	RAS_Hotspot_Mutants	Regional Lymph Node	0.53	0.6256
TCGA-EB-A42Y-01A-12R-A24X-07	Primary Tumor	Triple_WT	Primary Tumor	0.53	0.8398
TCGA-EB-A24D-01A-11R-A18T-07	Primary Tumor	BRAF_Hotspot_Mutants	Primary Tumor	0.53	0.9111
TCGA-EB-A24C-01A-11R-A18T-07	Primary Tumor	BRAF_Hotspot_Mutants	Primary Tumor	0.53	0.8893
TCGA-DA-A95Y-06A-11R-A37K-07	Metastatic	#N/A	Regional Lymph Node	0.53	0.7913
TCGA-DA-A3F5-06A-11R-A20F-07	Metastatic	BRAF_Hotspot_Mutants	Regional Lymph Node	0.53	0.7913
TCGA-DA-A1IA-06A-11R-A18S-07	Metastatic	Triple_WT	Distant Metastasis	0.53	0.9352
TCGA-DA-A1HW-06A-11R-A18U-07	Metastatic	BRAF_Hotspot_Mutants	Regional Lymph Node	0.53	0.6165
TCGA-DA-A1HV-06A-21R-A18S-07	Metastatic	RAS_Hotspot_Mutants	Regional Lymph Node	0.53	0.6554
TCGA-D9-A6EG-06A-12R-A32P-07	Metastatic	#N/A	Regional Skin	0.53	0.8975
TCGA-D9-A4Z6-06A-12R-A266-07	Metastatic	#N/A	Regional Lymph Node	0.53	0.8806
TCGA-D9-A4Z5-01A-11R-A266-07	Primary Tumor	Triple_WT	Primary Tumor	0.53	0.9072
TCGA-D9-A4Z3-01A-11R-A266-07	Primary Tumor	RAS_Hotspot_Mutants	Primary Tumor	0.53	0.859
TCGA-D9-A4Z2-01A-11R-A24X-07	Primary Tumor	BRAF_Hotspot_Mutants	Primary Tumor	0.53	0.7913
TCGA-D9-A1JX-06A-11R-A18S-07	Metastatic	BRAF_Hotspot_Mutants	Regional Lymph Node	0.53	0.6786
TCGA-D3-A8GQ-06A-11R-A37K-07	Metastatic	#N/A	Distant Metastasis	0.53	0.836
TCGA-D3-A8GP-06A-11R-A37K-07	Metastatic	#N/A	Distant Metastasis	0.53	0.9253
TCGA-D3-A8GI-06A-11R-A37K-07	Metastatic	#N/A	Regional Lymph Node	0.53	0.8571
TCGA-D3-A5GN-06A-11R-A27Q-07	Metastatic	BRAF_Hotspot_Mutants	Regional Lymph Node	0.53	0.7413
TCGA-D3-A51E-06A-11R-A266-07	Metastatic	RAS_Hotspot_Mutants	Regional Skin	0.53	0.6573
TCGA-D3-A3MV-06A-11R-A21D-07	Metastatic	RAS_Hotspot_Mutants	Regional Skin	0.53	0.8806
TCGA-D3-A3MU-06A-11R-A21D-07	Metastatic	BRAF_Hotspot_Mutants	Regional Lymph Node	0.53	0.8496
TCGA-D3-A3ML-06A-11R-A21D-07	Metastatic	RAS_Hotspot_Mutants	Regional Lymph Node	0.53	0.9862
TCGA-D3-A3CB-06A-11R-A18S-07	Metastatic	BRAF_Hotspot_Mutants	Regional Lymph Node	0.53	0.4002
TCGA-D3-A3C6-06A-12R-A18U-07	Metastatic	BRAF_Hotspot_Mutants	Regional Lymph Node	0.53	0.8806
TCGA-D3-A2JH-06A-11R-A18T-07	Metastatic	BRAF_Hotspot_Mutants	Regional Skin	0.53	0.5121
TCGA-D3-A2JD-06A-11R-A18T-07	Metastatic	BRAF_Hotspot_Mutants	Regional Lymph Node	0.53	0.634
TCGA-D3-A2JC-06A-11R-A18T-07	Metastatic	Triple_WT	Regional Lymph Node	0.53	0.6835
TCGA-D3-A1QB-06A-11R-A18T-07	Metastatic	RAS_Hotspot_Mutants	Regional Lymph Node	0.53	0.5201
TCGA-D3-A1QA-07A-11R-A37K-07	Additional Metastatic	#N/A	#N/A	0.53	0.836
TCGA-D3-A1Q9-06A-11R-A18T-07	Metastatic	BRAF_Hotspot_Mutants	Regional Lymph Node	0.53	0.7988
TCGA-D3-A1Q7-06A-11R-A18T-07	Metastatic	BRAF_Hotspot_Mutants	Regional Lymph Node	0.53	0.4524
TCGA-D3-A1Q5-06A-11R-A18T-07	Metastatic	BRAF_Hotspot_Mutants	Regional Lymph Node	0.53	0.891
TCGA-D3-A1Q3-06A-11R-A18T-07	Metastatic	Triple_WT	Regional Lymph Node	0.53	0.7422
TCGA-BF-A3DN-01A-11R-A20F-07	Primary Tumor	BRAF_Hotspot_Mutants	Primary Tumor	0.53	0.8286
TCGA-BF-A3DM-01A-11R-A20F-07	Primary Tumor	BRAF_Hotspot_Mutants	Primary Tumor	0.53	0.9253
TCGA-BF-A1Q0-01A-21R-A18S-07	Primary Tumor	Triple_WT	Primary Tumor	0.53	0.7019
TCGA-BF-A1PV-01A-11R-A18U-07	Primary Tumor	RAS_Hotspot_Mutants	Primary Tumor	0.53	0.949
TCGA-3N-A9WC-06A-11R-A38C-07	Metastatic	#N/A	Regional Lymph Node	0.53	0.6
TCGA-Z2-A8RT-06A-11R-A37K-07	Metastatic	#N/A	Regional Skin	0.52	0.7097
TCGA-YG-AA3N-01A-11R-A38C-07	Primary Tumor	#N/A	Primary Tumor	0.52	0.6458
TCGA-WE-A8ZT-06A-11R-A37K-07	Metastatic	#N/A	Regional Lymph Node	0.52	0.7913
TCGA-WE-A8ZM-06A-11R-A37K-07	Metastatic	#N/A	Regional Skin	0.52	0.9055
TCGA-WE-A8JZ-06A-11R-A37K-07	Metastatic	#N/A	Regional Lymph Node	0.52	0.9017
TCGA-OD-A75X-06A-12R-A32P-07	Metastatic	#N/A	Distant Metastasis	0.52	0.7913
TCGA-GN-A26D-06A-11R-A18T-07	Metastatic	Triple_WT	Regional Lymph Node	0.52	0.836
TCGA-FW-A5DX-01A-11R-A27Q-07	Primary Tumor	BRAF_Hotspot_Mutants	Primary Tumor	0.52	0.836
TCGA-FS-A1ZZ-06A-11R-A18S-07	Metastatic	NF1_Any_Mutants	Distant Metastasis	0.52	0.953
TCGA-FS-A1ZT-06A-11R-A18U-07	Metastatic	RAS_Hotspot_Mutants	Distant Metastasis	0.52	0.6716
TCGA-FS-A1ZS-06A-12R-A18T-07	Metastatic	BRAF_Hotspot_Mutants	Regional Lymph Node	0.52	0.8033
TCGA-FS-A1ZG-06A-11R-A18T-07	Metastatic	Triple_WT	Regional Lymph Node	0.52	0.9497
TCGA-FS-A1ZE-06A-11R-A18T-07	Metastatic	RAS_Hotspot_Mutants	Distant Metastasis	0.52	0.9253
TCGA-FS-A1ZA-06A-11R-A18T-07	Metastatic	NF1_Any_Mutants	Distant Metastasis	0.52	0.7146
TCGA-FS-A1Z3-06A-11R-A18T-07	Metastatic	RAS_Hotspot_Mutants	Distant Metastasis	0.52	0.8863
TCGA-FS-A1Z0-06A-11R-A18T-07	Metastatic	RAS_Hotspot_Mutants	Distant Metastasis	0.52	0.6391
TCGA-FS-A1YW-06A-11R-A18T-07	Metastatic	RAS_Hotspot_Mutants	Regional Lymph Node	0.52	0.8784
TCGA-FR-A8YE-06A-11R-A37K-07	Metastatic	#N/A	Regional Lymph Node	0.52	0.3294
TCGA-FR-A8YD-06A-11R-A37K-07	Metastatic	#N/A	Distant Metastasis	0.52	0.8892
TCGA-FR-A8YC-06A-11R-A37K-07	Metastatic	#N/A	Distant Metastasis	0.52	0.8318
TCGA-FR-A3YN-06A-11R-A239-07	Metastatic	RAS_Hotspot_Mutants	Regional Lymph Node	0.52	0.8158
TCGA-ER-A2NE-06A-21R-A18T-07	Metastatic	RAS_Hotspot_Mutants	Distant Metastasis	0.52	0.8043
TCGA-ER-A19T-01A-11R-A18T-07	Primary Tumor	-	Primary Tumor	0.52	0.943267
TCGA-ER-A19M-06A-61R-A239-07	Metastatic	BRAF_Hotspot_Mutants	Regional Lymph Node	0.52	0.5808
TCGA-ER-A19J-06A-11R-A18S-07	Metastatic	BRAF_Hotspot_Mutants	Regional Lymph Node	0.52	0.7972
TCGA-ER-A19F-06A-11R-A18S-07	Metastatic	NF1_Any_Mutants	Regional Lymph Node	0.52	0.8768
TCGA-ER-A19B-06A-11R-A18S-07	Metastatic	BRAF_Hotspot_Mutants	Regional Skin	0.52	0.8622
TCGA-ER-A198-06A-11R-A18T-07	Metastatic	BRAF_Hotspot_Mutants	Regional Skin	0.52	0.7558
TCGA-EE-A3AG-06A-31R-A18S-07	Metastatic	BRAF_Hotspot_Mutants	Regional Skin	0.52	0.836
TCGA-EE-A3AD-06A-11R-A18S-07	Metastatic	BRAF_Hotspot_Mutants	Regional Lymph Node	0.52	0.9432
TCGA-EE-A2MR-06A-11R-A18S-07	Metastatic	Triple_WT	Regional Lymph Node	0.52	0.3303
TCGA-EE-A2MQ-06A-11R-A18S-07	Metastatic	BRAF_Hotspot_Mutants	Regional Lymph Node	0.52	0.7733
TCGA-EE-A2MN-06A-11R-A18S-07	Metastatic	RAS_Hotspot_Mutants	Regional Lymph Node	0.52	0.7466
TCGA-EE-A2ML-06A-11R-A18S-07	Metastatic	RAS_Hotspot_Mutants	Regional Lymph Node	0.52	0.7446
TCGA-EE-A2MD-06A-11R-A18T-07	Metastatic	RAS_Hotspot_Mutants	Regional Lymph Node	0.52	0.8366
TCGA-EE-A2GU-06A-11R-A18T-07	Metastatic	RAS_Hotspot_Mutants	Regional Lymph Node	0.52	0.7631
TCGA-EE-A29X-06A-11R-A18T-07	Metastatic	RAS_Hotspot_Mutants	Regional Lymph Node	0.52	0.6642
TCGA-EE-A29W-06A-11R-A18U-07	Metastatic	BRAF_Hotspot_Mutants	Regional Lymph Node	0.52	0.836
TCGA-EE-A29L-06A-12R-A18S-07	Metastatic	RAS_Hotspot_Mutants	Regional Lymph Node	0.52	0.8806
TCGA-EE-A29H-06A-12R-A18S-07	Metastatic	BRAF_Hotspot_Mutants	Regional Lymph Node	0.52	0.7913
TCGA-EE-A29D-06A-11R-A18T-07	Metastatic	Triple_WT	Regional Lymph Node	0.52	0.8806
TCGA-EE-A20H-06A-11R-A18S-07	Metastatic	BRAF_Hotspot_Mutants	Distant Metastasis	0.52	0.9253
TCGA-EE-A181-06A-11R-A18S-07	Metastatic	NF1_Any_Mutants	Regional Lymph Node	0.52	0.6788
TCGA-EE-A180-06A-11R-A21D-07	Metastatic	NF1_Any_Mutants	Distant Metastasis	0.52	0.8806
TCGA-EB-A6R0-01A-12R-A32P-07	Primary Tumor	#N/A	Primary Tumor	0.52	0.7816
TCGA-EB-A44O-01A-11R-A266-07	Primary Tumor	RAS_Hotspot_Mutants	Primary Tumor	0.52	0.7519
TCGA-EB-A431-01A-11R-A266-07	Primary Tumor	BRAF_Hotspot_Mutants	Primary Tumor	0.52	0.9253
TCGA-DA-A3F3-06A-11R-A20F-07	Metastatic	RAS_Hotspot_Mutants	Regional Lymph Node	0.52	0.7913
TCGA-DA-A1I8-06A-11R-A18T-07	Metastatic	BRAF_Hotspot_Mutants	Regional Skin	0.52	0.8222
TCGA-DA-A1I1-06A-12R-A18U-07	Metastatic	RAS_Hotspot_Mutants	Regional Skin	0.52	0.6089
TCGA-D9-A3Z3-06A-11R-A239-07	Metastatic	BRAF_Hotspot_Mutants	Regional Lymph Node	0.52	0.6201
TCGA-D9-A1X3-06A-11R-A18S-07	Metastatic	#N/A	Regional Skin	0.52	0.9451
TCGA-D9-A149-06A-11R-A18S-07	Metastatic	Triple_WT	Regional Skin	0.52	0.7213
TCGA-D3-A5GR-06A-11R-A27Q-07	Metastatic	BRAF_Hotspot_Mutants	Regional Lymph Node	0.52	0.5875
TCGA-D3-A3CE-06A-11R-A18S-07	Metastatic	BRAF_Hotspot_Mutants	Regional Lymph Node	0.52	0.6368
TCGA-D3-A2J6-06A-11R-A18T-07	Metastatic	Triple_WT	Regional Lymph Node	0.52	0.8045
TCGA-D3-A1QA-06A-11R-A18T-07	Metastatic	BRAF_Hotspot_Mutants	Regional Lymph Node	0.52	0.832967
TCGA-D3-A1Q4-06A-11R-A18T-07	Metastatic	BRAF_Hotspot_Mutants	Regional Lymph Node	0.52	0.7201
TCGA-BF-AAP6-01A-11R-A40A-07	Primary Tumor	#N/A	Primary Tumor	0.52	0.8006
TCGA-Z2-AA3S-06A-11R-A39D-07	Metastatic	#N/A	Regional Lymph Node	0.51	0.8417
TCGA-YG-AA3O-06A-11R-A38C-07	Metastatic	#N/A	Regional Lymph Node	0.51	0.7686
TCGA-WE-A8ZY-06A-11R-A37K-07	Metastatic	#N/A	Regional Skin	0.51	0.836
TCGA-WE-A8ZO-06A-11R-A37K-07	Metastatic	#N/A	Regional Lymph Node	0.51	0.7426
TCGA-FW-A3TV-06A-11R-A239-07	Metastatic	BRAF_Hotspot_Mutants	Regional Lymph Node	0.51	0.7913
TCGA-FS-A1ZQ-06A-11R-A18U-07	Metastatic	RAS_Hotspot_Mutants	Distant Metastasis	0.51	0.8634
TCGA-FS-A1ZK-06A-11R-A18T-07	Metastatic	RAS_Hotspot_Mutants	Distant Metastasis	0.51	0.9161
TCGA-ER-A2NG-06A-11R-A18T-07	Metastatic	BRAF_Hotspot_Mutants	Regional Lymph Node	0.51	0.5159
TCGA-ER-A19Q-06A-11R-A18U-07	Metastatic	BRAF_Hotspot_Mutants	Regional Lymph Node	0.51	0.5125
TCGA-ER-A19H-06A-12R-A18S-07	Metastatic	BRAF_Hotspot_Mutants	Regional Skin	0.51	0.6757
TCGA-EE-A3AC-06A-11R-A18S-07	Metastatic	RAS_Hotspot_Mutants	Regional Lymph Node	0.51	0.7927
TCGA-EE-A2GR-06A-11R-A18S-07	Metastatic	NF1_Any_Mutants	Regional Skin	0.51	0.9573
TCGA-EE-A2GJ-06A-11R-A18U-07	Metastatic	RAS_Hotspot_Mutants	Regional Lymph Node	0.51	0.7012
TCGA-EE-A2GB-06A-11R-A18T-07	Metastatic	BRAF_Hotspot_Mutants	Regional Lymph Node	0.51	0.7019
TCGA-EE-A20I-06A-11R-A18U-07	Metastatic	Triple_WT	Regional Skin	0.51	0.7623
TCGA-EE-A185-06A-11R-A18S-07	Metastatic	RAS_Hotspot_Mutants	Regional Lymph Node	0.51	0.9253
TCGA-D9-A1JW-06A-11R-A18S-07	Metastatic	Triple_WT	Regional Lymph Node	0.51	0.652
TCGA-D9-A148-06A-11R-A18S-07	Metastatic	BRAF_Hotspot_Mutants	Regional Lymph Node	0.51	0.8168
TCGA-D3-A8GM-06A-11R-A37K-07	Metastatic	#N/A	Regional Lymph Node	0.51	0.7744
TCGA-D3-A8GL-06A-11R-A37K-07	Metastatic	#N/A	Regional Skin	0.51	0.9764
TCGA-D3-A8GK-06A-11R-A37K-07	Metastatic	#N/A	Distant Metastasis	0.51	0.9253
TCGA-WE-A8ZR-06A-11R-A37K-07	Metastatic	#N/A	Regional Lymph Node	0.5	0.836
TCGA-DA-A95X-06A-11R-A37K-07	Metastatic	#N/A	Regional Lymph Node	0.5	0.7913
TCGA-D3-A8GC-06A-11R-A37K-07	Metastatic	#N/A	Regional Lymph Node	0.5	0.8785
